# Supplementary material
Source: PubMed Central journal article supplement (PMC10765610)
Supplement: sciimmunol.abj2901_sm.pdf [file sciimmunol.abj2901_sm.pdf]

Supplementary Materials for  
**Early cross-coronavirus reactive signatures of humoral  
immunity against COVID-19**

Paulina Kaplonek *et al.*

Corresponding author: Marcia B. Goldberg, [marcia.goldberg@mgh.harvard.edu](mailto:marcia.goldberg@mgh.harvard.edu);  
Michael R. Filbin, [mfilbin@mgh.harvard.edu](mailto:mfilbin@mgh.harvard.edu); Nir Hacohen, [nhacohen@mgh.harvard.edu](mailto:nhacohen@mgh.harvard.edu);  
Douglas A. Lauffenburger, [lauffen@mit.edu](mailto:lauffen@mit.edu); Galit Alter, [galter@partners.org](mailto:galter@partners.org)

*Sci. Immunol.* **6**, eabj2901 (2021)  
DOI: 10.1126/sciimmunol.abj2901

**The PDF file includes:**

Figs. S1 to S4  
Table S1  
Legend for table S2

**Other Supplementary Material for this manuscript includes the following:**

Table S2

## Supplementary materials

### *Supplementary Figures and Tables:*

**Fig. S1.** Distribution of RBD-, S-, S1-, S2- and N-specific antibody isotypes/ subclasses and their ability to bind Fc-receptors across acutely ill COVID-19 patients.

**Fig. S2.** The Spearman correlation between SARS-CoV-2 and human cCoV OC43 antibody levels and neutralization level over time.

**Fig. S3.** Temporal evolution of SARS-CoV-2 specific antibody.

**Fig. S4.** Defined symptom groups for community acquired-COVID-19 mild and asymptomatic individuals.

**Table S1.** Samples distribution across disease severity and days intervals since symptoms onset.

**Table S2.** The raw data (Excel datasheet).

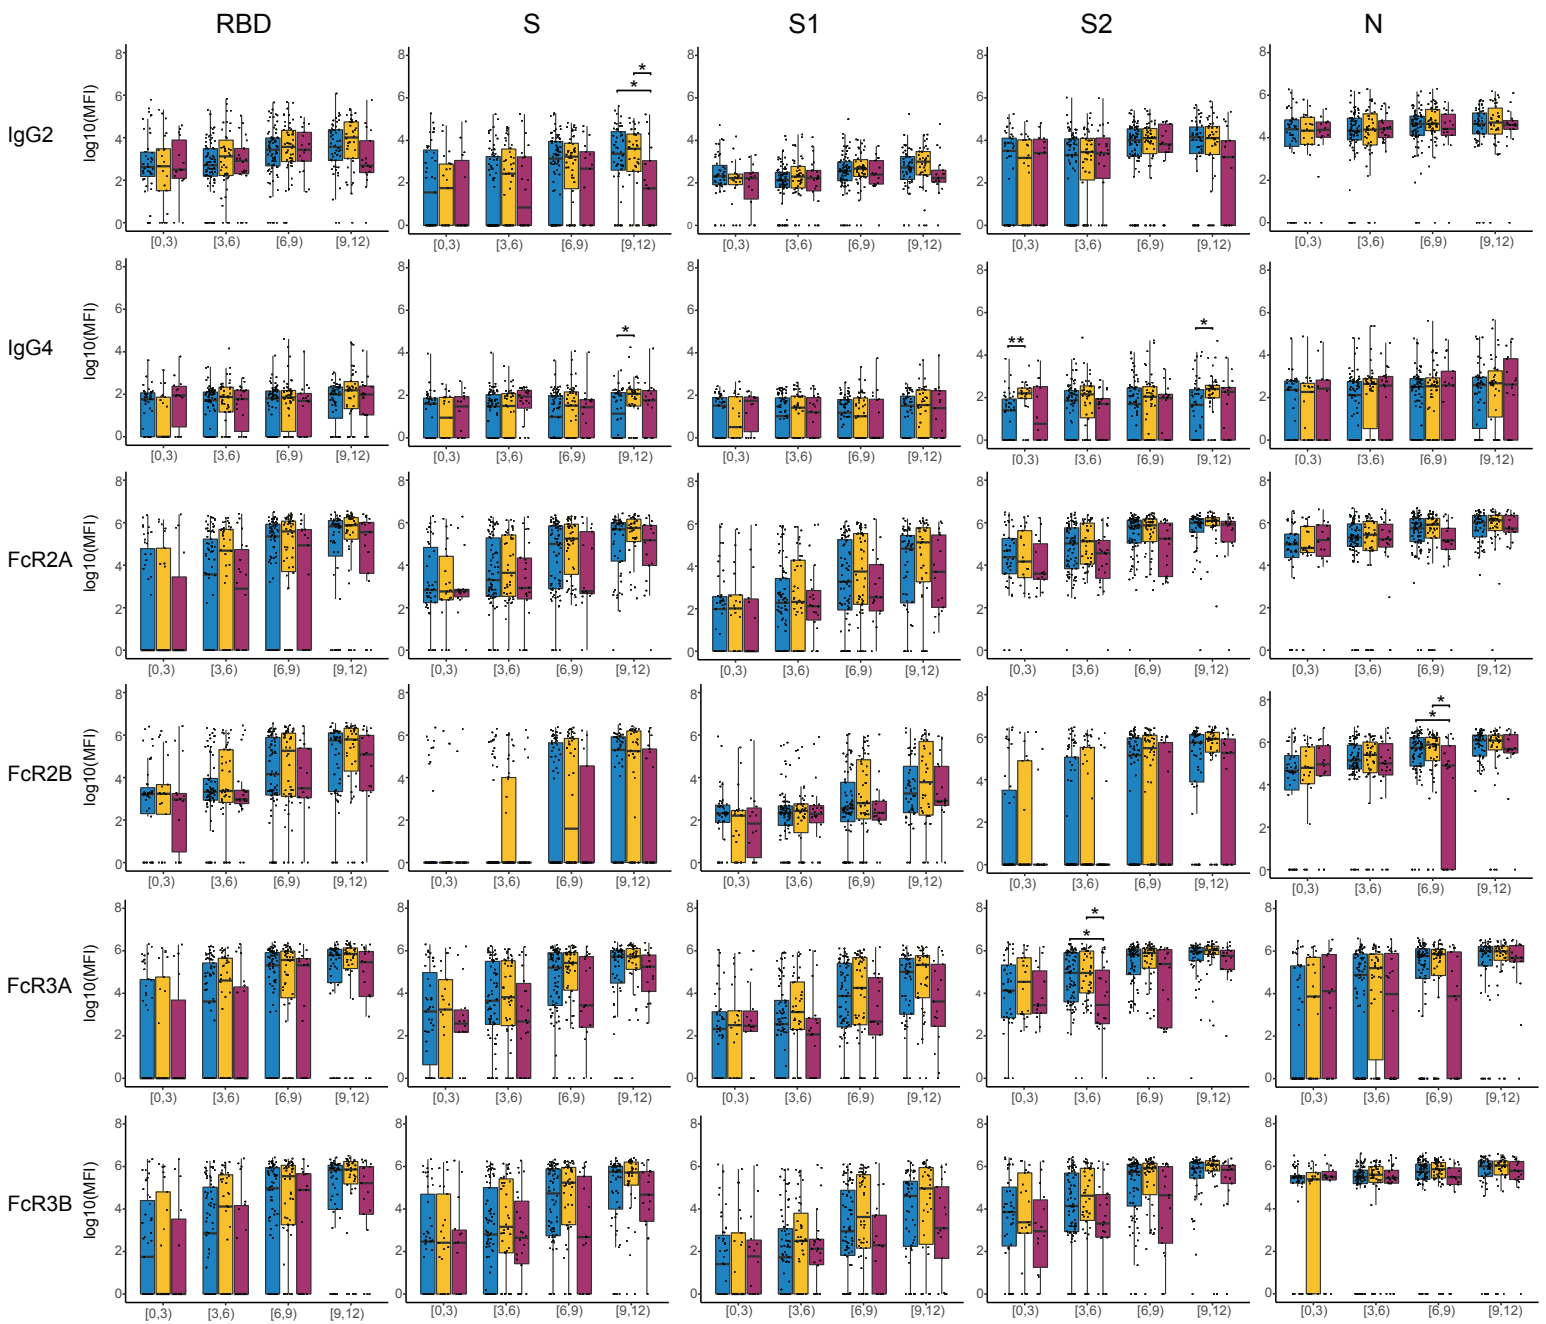

**Fig. S1. Distribution of RBD-, S-, S1-, S2- and N-specific antibody isotypes/ subclasses and their ability to bind Fc-receptors across acutely ill COVID-19 patients.**

The immune response of SARS-CoV-2 infected individuals was profiled against SARS-CoV-2 antigens. Distributions of IgG2, IgG4 as antibody titers and binding to Fc $\gamma$ R2A, Fc $\gamma$ R2B, Fc $\gamma$ R3A, Fc $\gamma$ R3B across moderate (blue), severe (yellow) and deceased (red) COVID-19 patients are shown as box-plots over the time intervals (0-3, 3-6, 6-9, 9-12) following symptom onset. The solid black line represents the median, and the upper and bottom lines of box plots show the first and third quartiles. Values are reported as log<sub>10</sub> MFI. A two-sample Wilcoxon test was used to evaluate statistical differences across groups for all the intervals and features. The P-values were corrected from multiple hypothesis testing using the Benjamini-Hochberg procedure per each interval. Here, significance corresponds to the adjusted P-values. (\*  $p < 0.05$ , \*\*  $p < 0.01$ ).

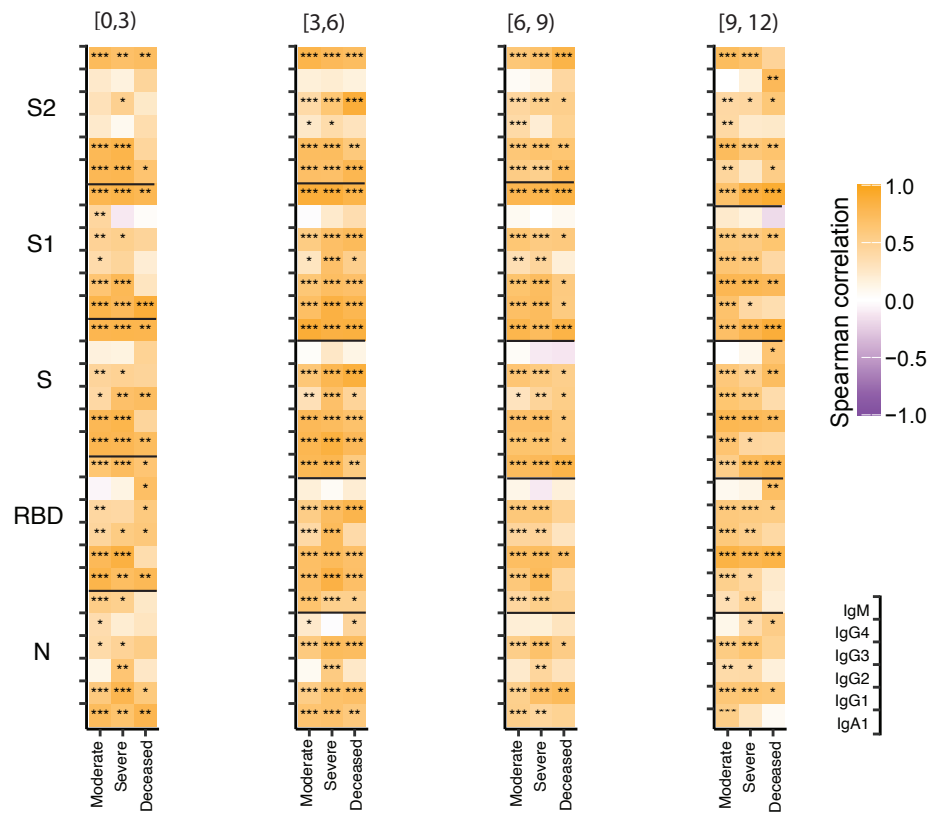

**Fig. S2. The Spearman correlation between SARS-CoV-2 and human cCoV OC43 antibody levels and neutralization level over time.**

(A) The correlation heatmap between isotypes/subclasses and neutralization level across different SARS-CoV-2 epitopes measured by Spearman Correlation. (B) The correlation heatmap between OC43 -specific isotypes/subclasses and neutralization across different time courses. The adjusted p values by the Benjamini-Hochberg procedure were labeled as asterisk (\*  $p < 0.05$ , \*\*  $p < 0.01$ , \*\*\*  $p < 0.001$ ).

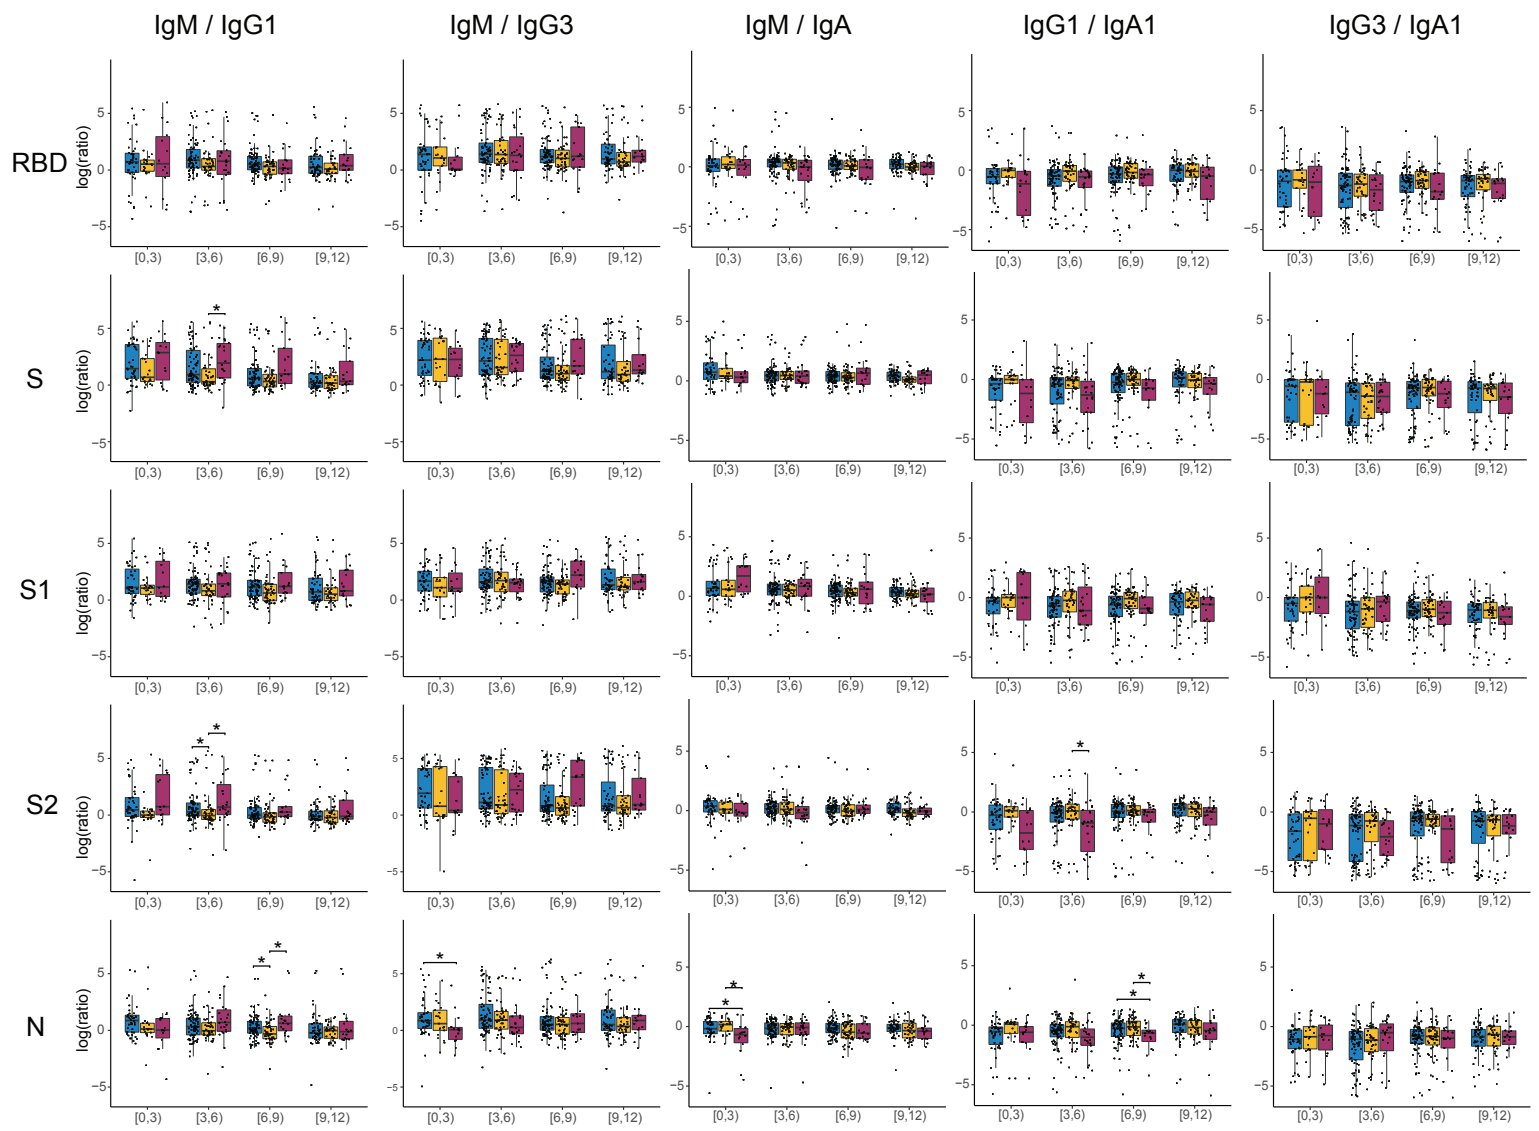

**Fig. S3. Temporal evolution of SARS-CoV-2 specific antibody.**

Distributions of IgM, IgG1, IgG3, and IgA1 ratios among multiple SARS-CoV-2 specific antibodies across the different time course. A two-sample Wilcoxon test corrected for multiple hypothesis testing using the Benjamini-Hochberg procedure pre-time course was used to evaluate statistical differences. Significance represents the adjusted P-values: (\*  $p < 0.05$ , \*\*  $p < 0.01$ , \*\*\*  $p < 0.001$ ).



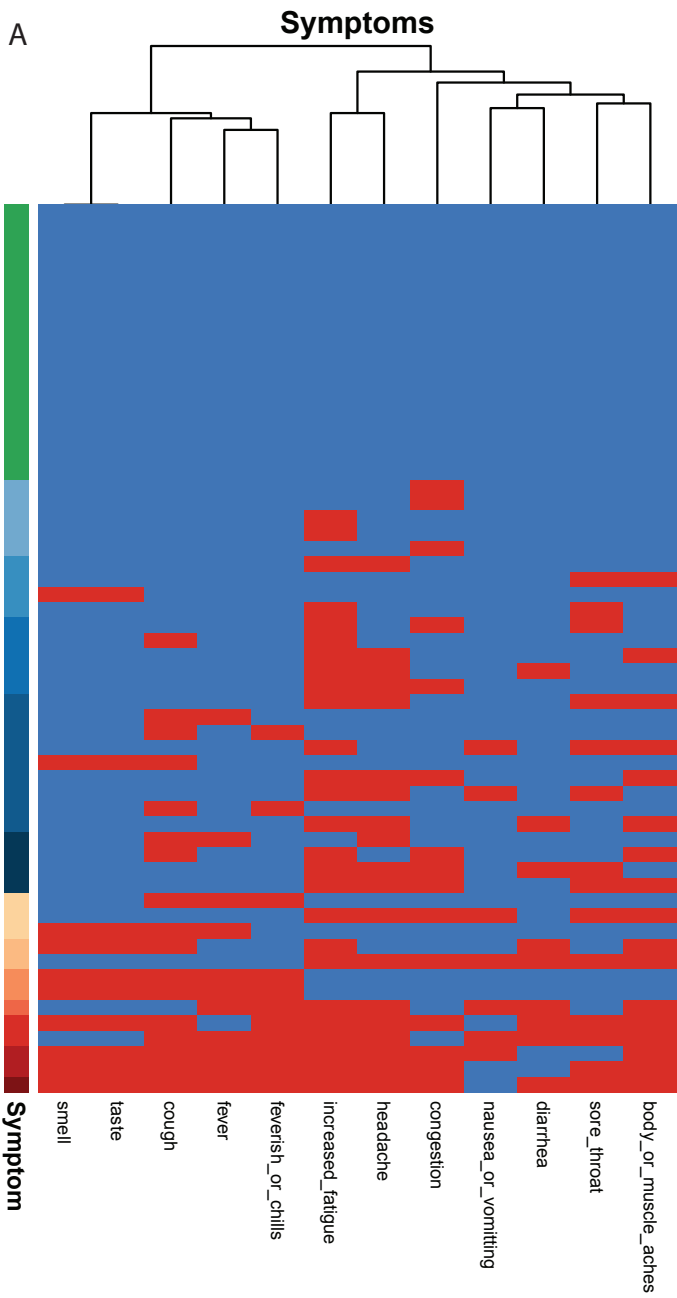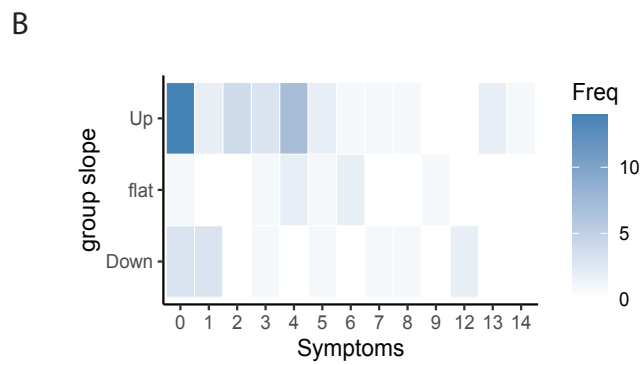

**Fig. S4. Defined symptom groups for community acquired-COVID-19 mild and asymptomatic individuals.**

The patients were divided into groups with or without COVID-19 symptoms based on 14 symptoms reported in a questionnaire. More severe COVID-19 symptoms, such as loss of smell/taste, fever, feverish/chills, or cough, were scored higher (2 points), and other, such as increased fatigue, headache, congestion, nausea/vomiting, diarrhea, sore throat, and body/muscle aches, were score with 1 point. The scale shows weighted numbers of observed symptoms and is visualized from the top (asymptomatic group: red) to bottom (an asymptomatic group with an increased number of symptoms: blue to red). **(A)** The symptom heatmap. Patients with reported clinical symptoms were marked in red, lack of symptoms was reported in blue. **(B)** The counts of relationships between defined symptoms and groups defined by the titer difference between pre-existing OC43 S-IgG1 and its corresponding titer value after SARS-CoV-2 infection.

| #samples/#patients | Deceased | Severe | Moderate | Total   |
|--------------------|----------|--------|----------|---------|
| Day 0-3            | 14/14    | 21/21  | 43/43    | 78/78   |
| Day 3-6            | 22/22    | 42/42  | 77/77    | 141/141 |
| Day 6-9            | 17/17    | 50/50  | 76/76    | 143/143 |
| Day 9-12           | 17/17    | 38/38  | 52/52    | 107/107 |
| Total              | 70/37    | 151/62 | 248/118  | 469/217 |

**Table S1. Samples distribution across disease severity and days intervals since symptoms onset.**
